# Supplementary material for: Protein arginine deiminase 4 antagonizes methylglyoxal-induced histone glycation
Source: PubMed Central journal article supplement (PMC7319962; doi:10.1038/s41467-020-17066-y), 2020-06-26
Supplement: 41467_2020_17066_MOESM4_ESM.pdf [file 41467_2020_17066_MOESM4_ESM.pdf]

Figure 2

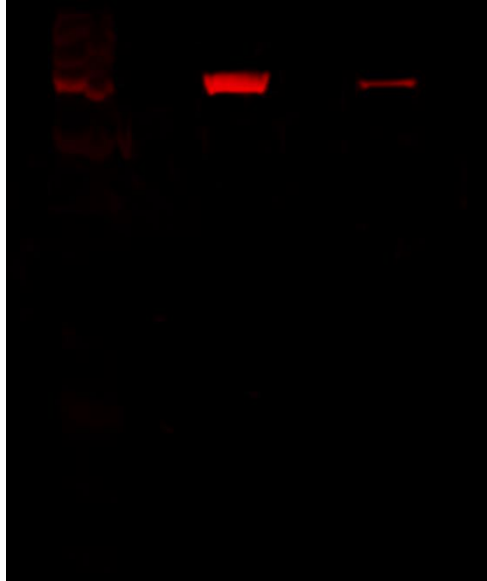

Fig. 2a (anti-MGO)

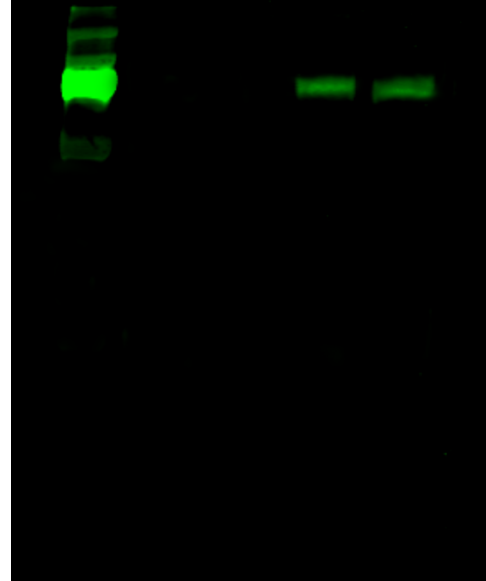

Fig. 2a (anti-H3 Cit)

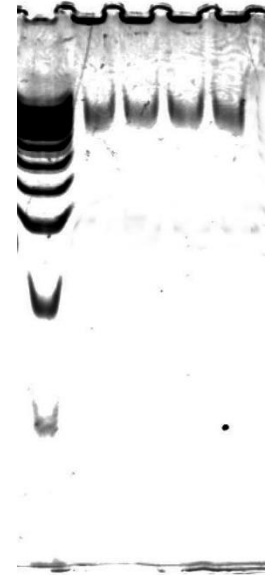

Fig. 2a (EtBr)

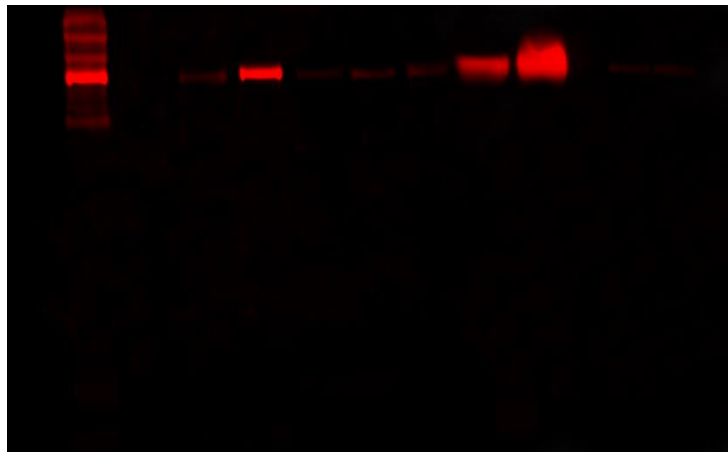

Fig. 2b (anti-MGO)

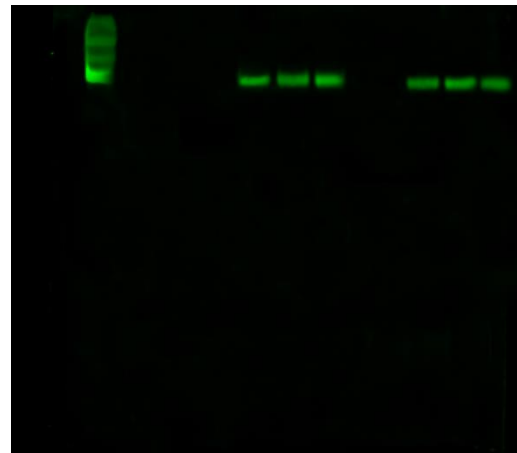

Fig. 2b (anti-H3 Cit)

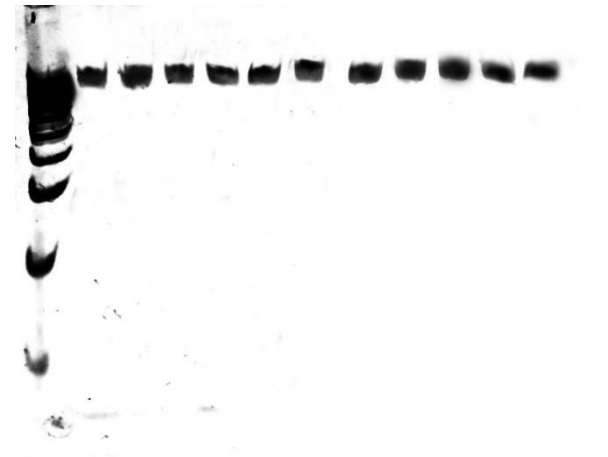

Fig. 2b (EtBr)

Figure 2

|     | MGO -, PAD4 - |       |       | MGO +, PAD4 - |       |      | MGO -, PAD4 + |       |       | MGO +, PAD4 + (C) |       |       | MGO + (S), PAD4 + |       |       | MGO + (L), PAD4 + |       |       |
|-----|---------------|-------|-------|---------------|-------|------|---------------|-------|-------|-------------------|-------|-------|-------------------|-------|-------|-------------------|-------|-------|
| 0.0 | 100.0         | 100.0 | 100.0 | 100.0         | 100.0 | 100. | 100.0         | 100.0 | 100.0 | 100.0             | 100.0 | 100.0 | 100.0             | 100.0 | 100.0 | 100.0             | 100.0 | 100.0 |
| 0.5 | 83.0          | 82.0  | 78.0  | 98.0          | 96.0  | 100. | 83.0          | 87.0  | 90.0  | 88.0              | 92.0  | 94.0  | 92.0              | 95.0  | 95.0  | 93.0              | 96.0  | 98.0  |
| 1.0 | 75.9          | 70.0  | 64.0  | 95.0          | 93.0  | 86.  | 78.0          | 75.0  | 71.0  | 81.0              | 78.0  | 75.0  | 84.0              | 82.0  | 78.0  | 84.0              | 85.0  | 86.0  |
| 1.5 | 62.0          | 50.0  | 64.0  | 89.5          | 82.0  | 90.  | 70.0          | 65.0  | 63.0  | 73.0              | 68.0  | 66.0  | 77.0              | 74.0  | 70.0  | 80.0              | 75.0  | 76.0  |
| 2.0 | 47.0          | 44.5  | 30.3  | 68.0          | 75.0  | 79.  | 46.0          | 55.0  | 54.0  | 49.0              | 60.0  | 59.0  | 53.0              | 62.0  | 64.0  | 56.0              | 68.0  | 65.0  |
| 2.5 | 10.1          | 14.0  | 5.6   | 58.0          | 40.0  | 53.  | 28.0          | 20.0  | 22.0  | 30.0              | 23.0  | 25.0  | 34.0              | 25.0  | 28.0  | 37.0              | 28.0  | 32.0  |

Fig. 2c

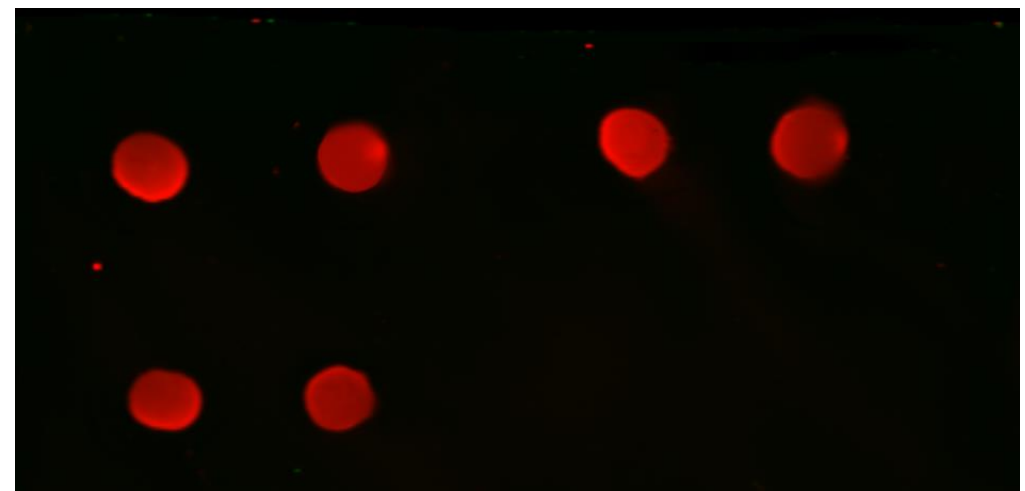

Atto 680-Streptavidin

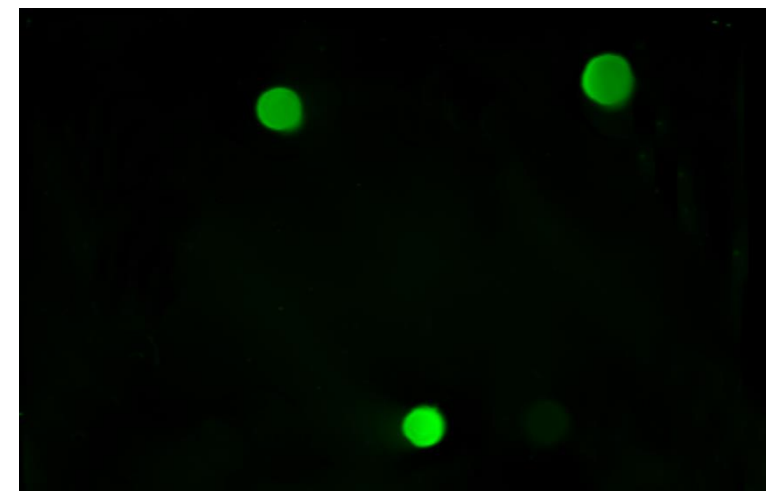

anti-MGO

Fig. 2d

Figure 3

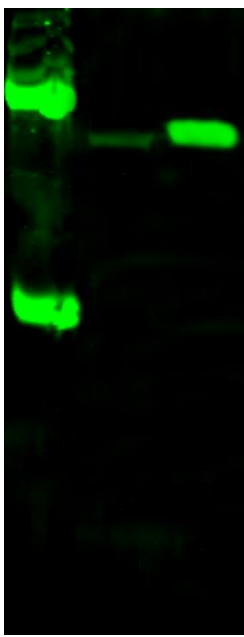

Fig. 3a (anti-PAD4)

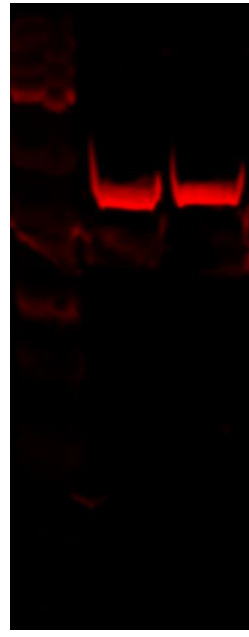

Fig. 3a (anti-actin)

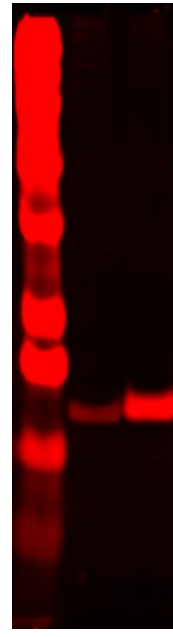

Fig. 3a (anti-H3Cit)

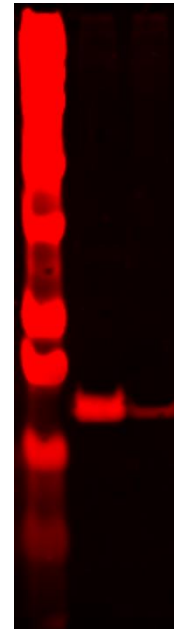

Fig. 3a (anti-H3R8me2)

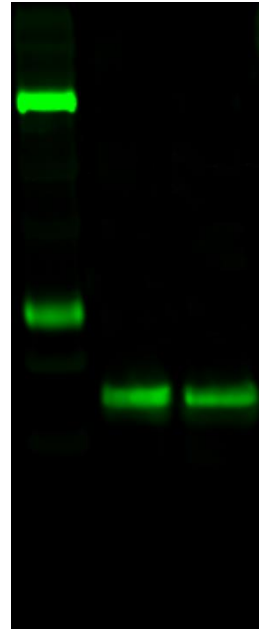

Fig. 3a (anti-H3)

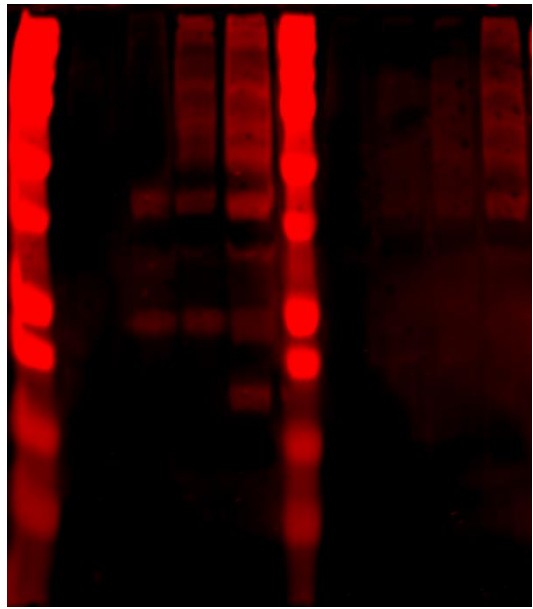

Fig. 3a (anti-MGO)

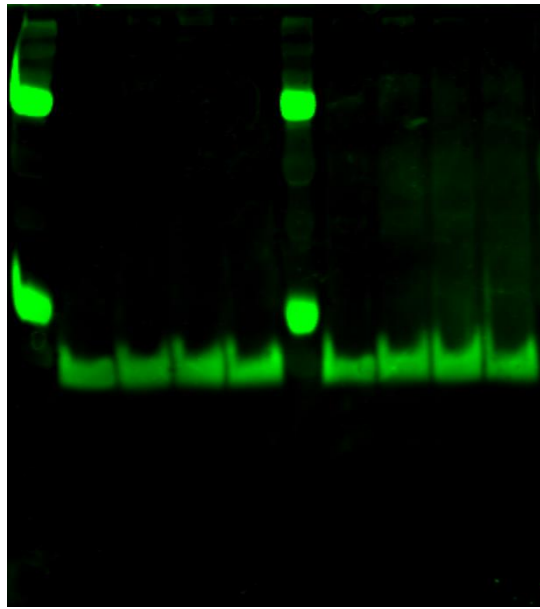

Fig. 3a (anti-H3)

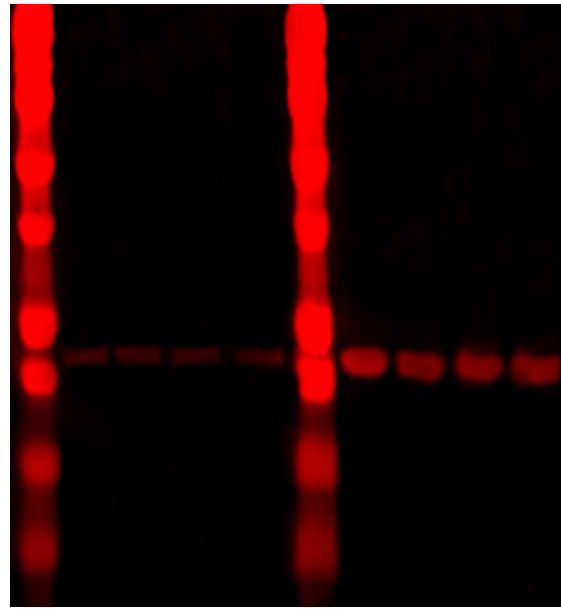

Fig. 3a (anti-H3Cit)

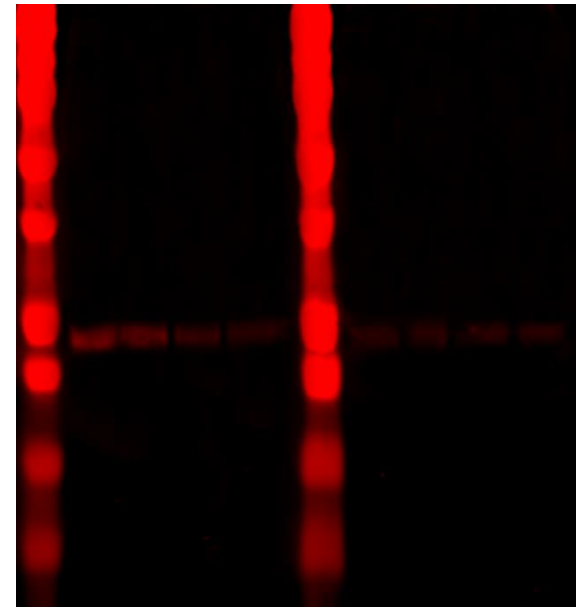

Fig. 3a (anti-H3R8me2)

Figure 3

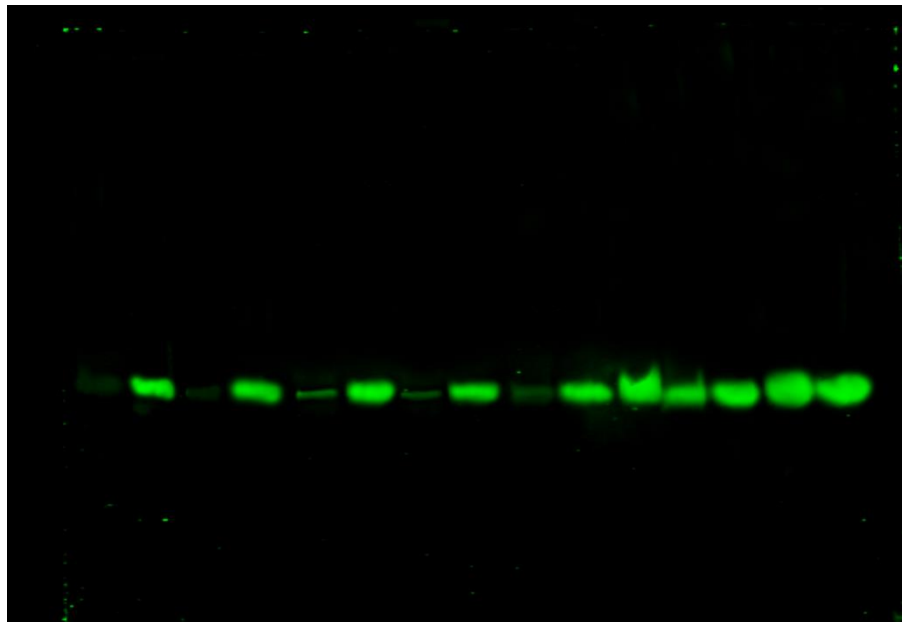

Fig. 3b (anti-H3)

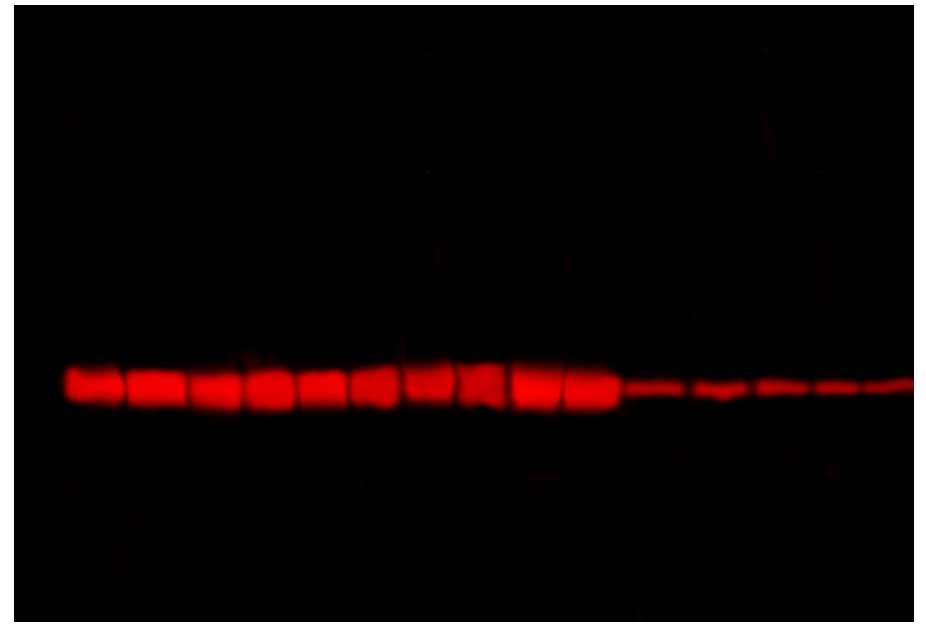

Fig. 3b (anti-H3Cit)

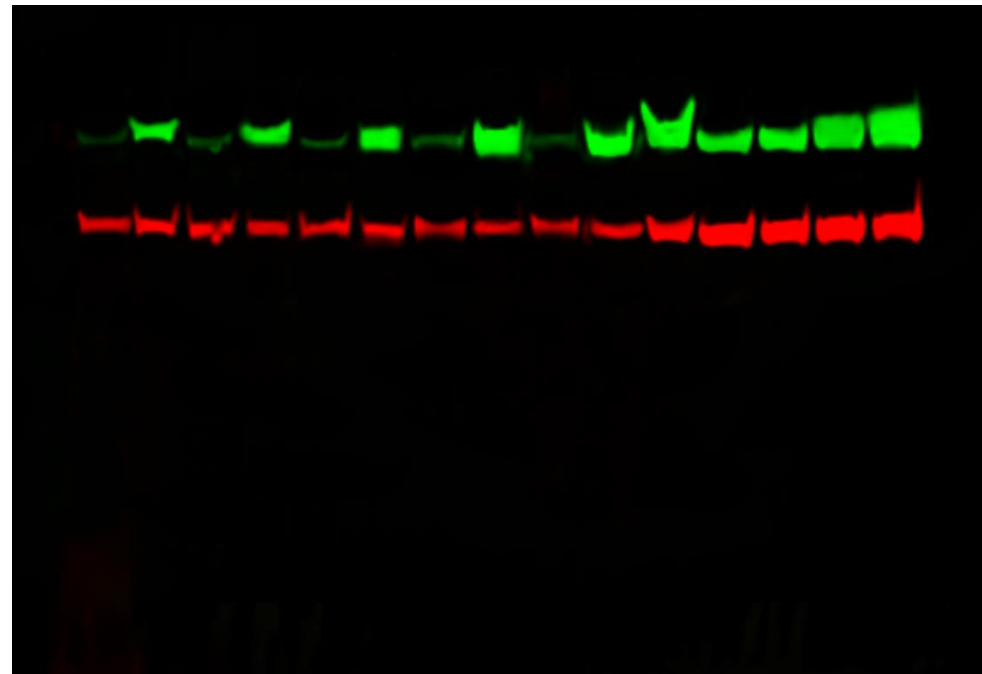

Fig. 3b (anti-PAD4 & anti-actin)

Supplementary Figure 2

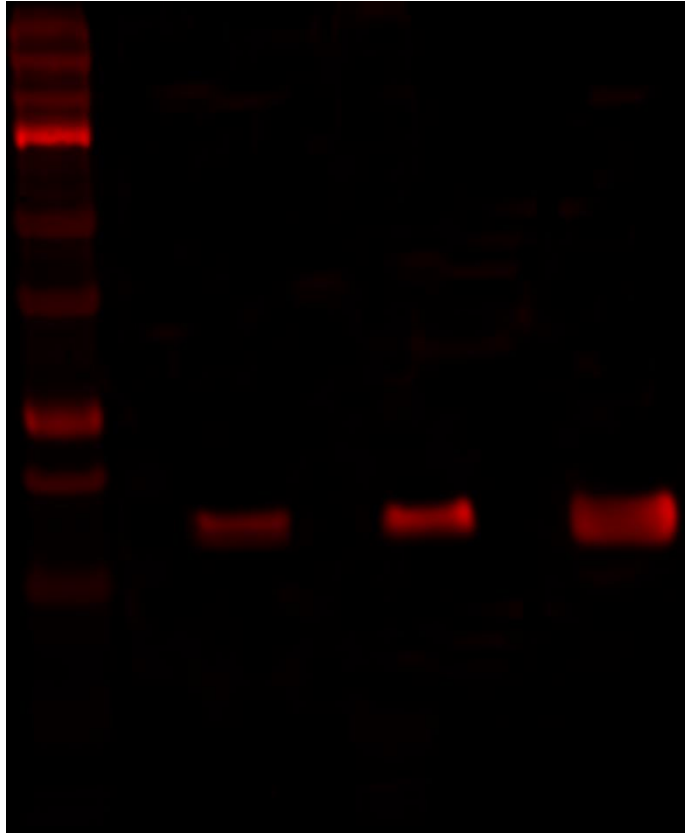

anti-H3Cit

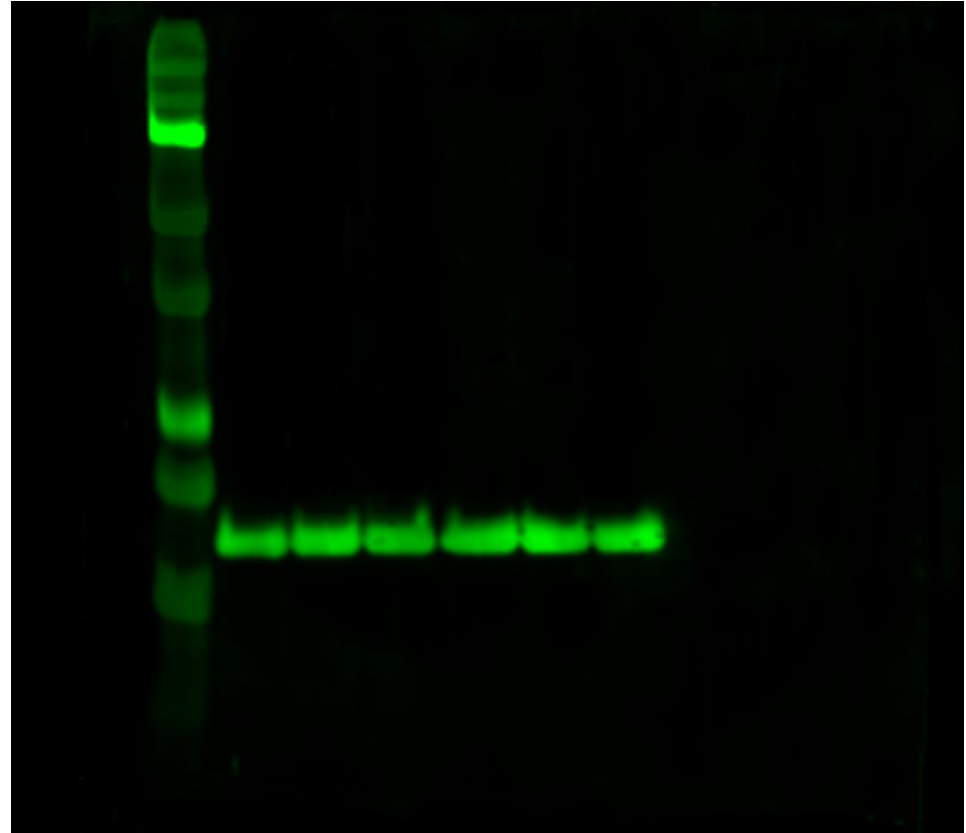

anti-H3

Supplementary Figure 3

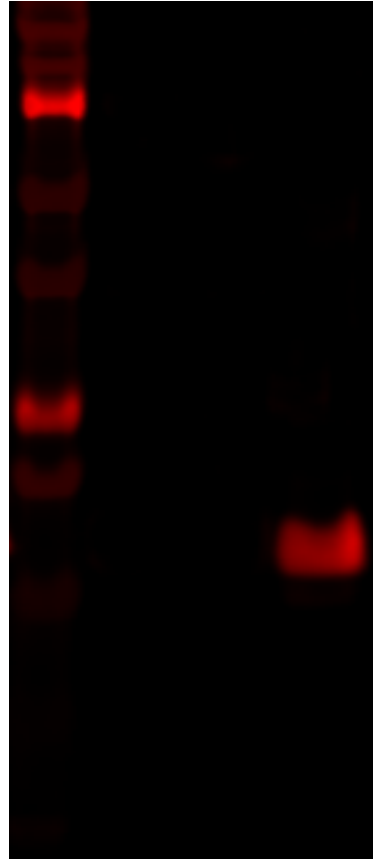

anti-H3Cit

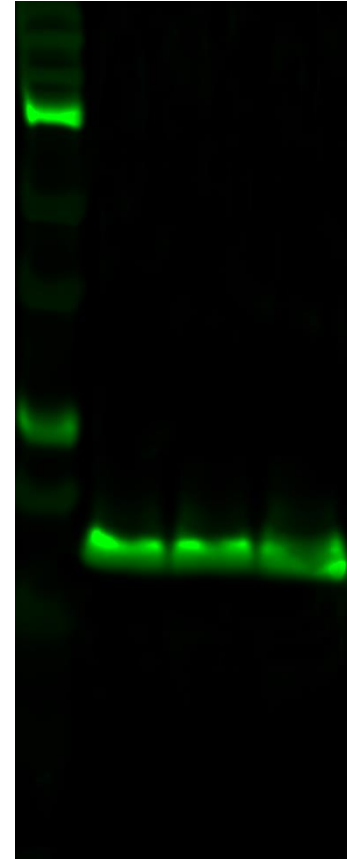

anti-H3

Supplementary Figure 4

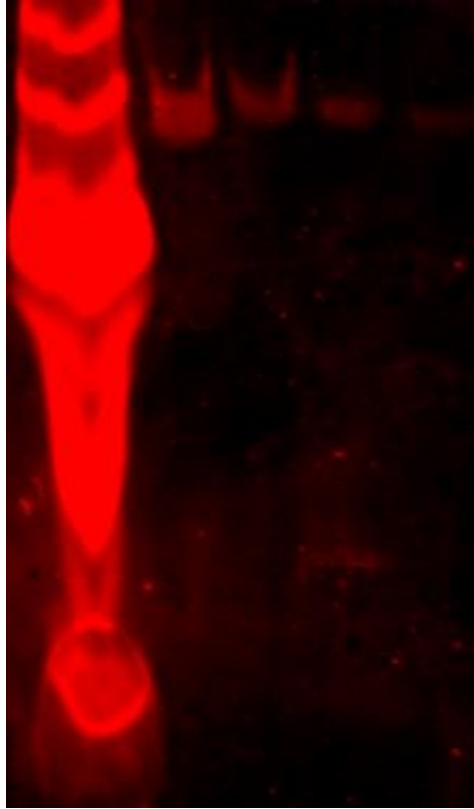

anti-MGO

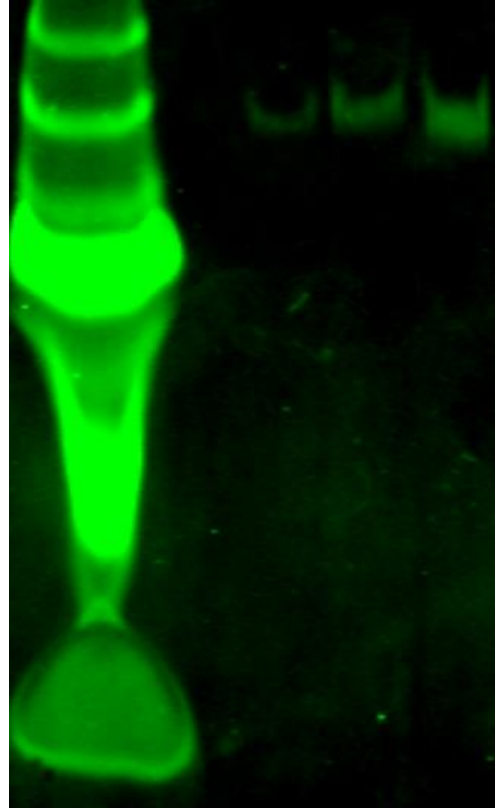

anti-H3Cit

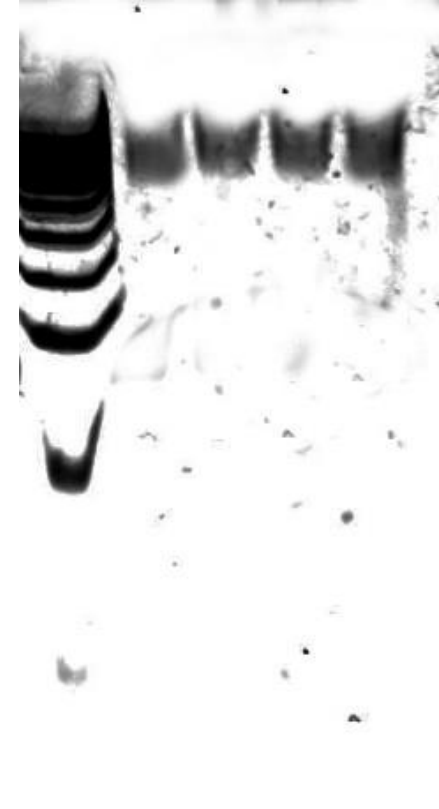

EtBr

Supplementary Figure 7

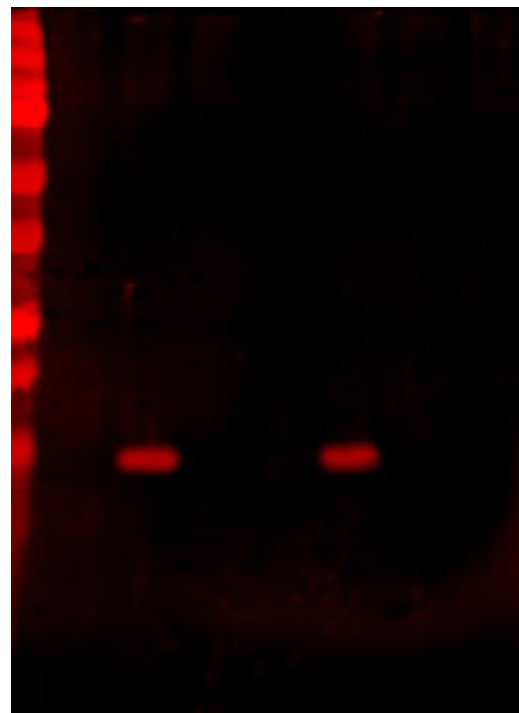

anti-H4Cit3

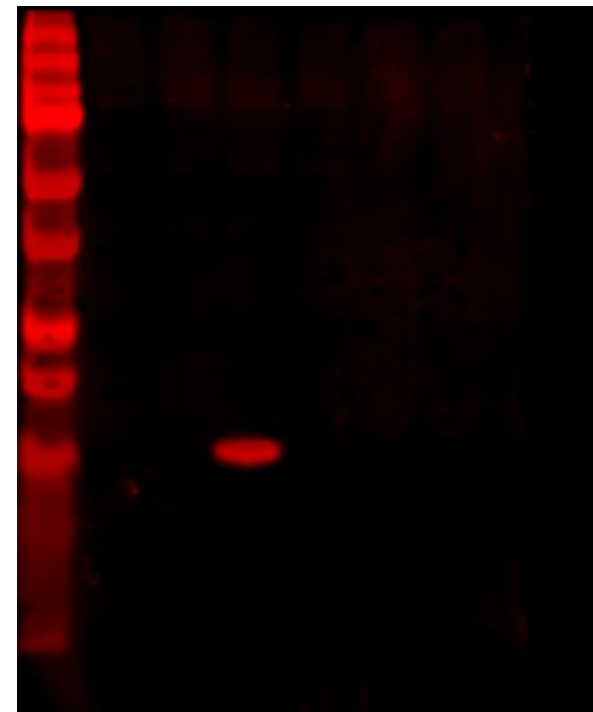

anti-H4R3me2

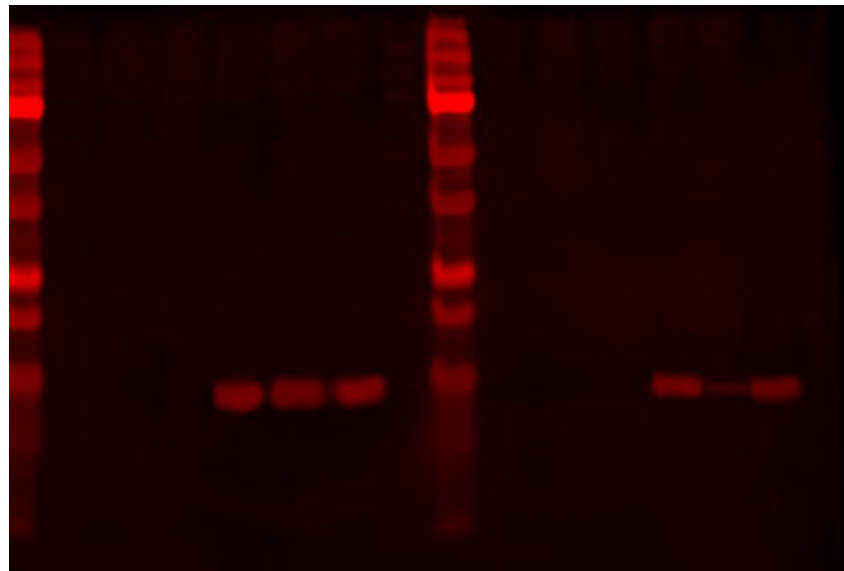

anti-MGO

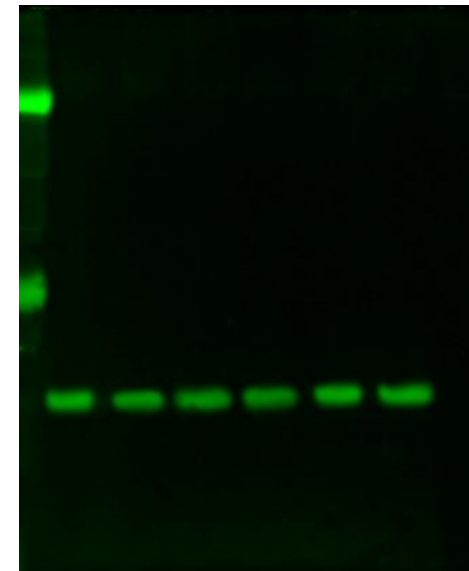

anti-H4



# Supplementary Figure 8

|     | MGO -, DJ-1 - |       |       | MGO +, DJ-1 - |       |      | MGO -, DJ-1 + |       |       | MGO +, DJ-1 + (Co) |       |       | MGO + (S), DJ-1 + |       |       | MGO + (L), DJ-1 + |       |       |
|-----|---------------|-------|-------|---------------|-------|------|---------------|-------|-------|--------------------|-------|-------|-------------------|-------|-------|-------------------|-------|-------|
| 0.0 | 100.0         | 100.0 | 100.0 | 100.0         | 100.0 | 100. | 100.0         | 100.0 | 100.0 | 100.0              | 100.0 | 100.0 | 100.0             | 100.0 | 100.0 | 100.0             | 100.0 | 100.0 |
| 0.5 | 83.0          | 82.0  | 78.0  | 98.0          | 96.0  | 100. | 80.0          | 79.0  | 74.0  | 84.0               | 83.0  | 80.0  | 88.0              | 90.0  | 84.0  | 96.0              | 97.0  | 96.0  |
| 1.0 | 75.9          | 70.0  | 64.0  | 95.0          | 93.0  | 86.  | 73.0          | 68.0  | 60.0  | 76.0               | 72.0  | 65.0  | 82.0              | 74.0  | 68.0  | 90.0              | 88.0  | 89.0  |
| 1.5 | 62.0          | 50.0  | 64.0  | 89.5          | 82.0  | 90.  | 59.0          | 48.0  | 62.0  | 63.0               | 51.0  | 65.0  | 68.0              | 55.0  | 66.0  | 86.0              | 82.0  | 84.0  |
| 2.0 | 47.0          | 44.5  | 30.3  | 68.0          | 75.0  | 79.  | 45.0          | 41.0  | 29.0  | 48.0               | 46.0  | 32.0  | 50.0              | 53.0  | 39.0  | 62.0              | 68.0  | 70.0  |
| 2.5 | 10.1          | 14.0  | 5.6   | 58.0          | 40.0  | 53.  | 9.0           | 10.0  | 5.3   | 11.0               | 15.0  | 7.0   | 14.0              | 12.0  | 16.0  | 47.0              | 36.0  | 49.0  |

Fig. S8a

|     | MGO -, enzyme - |       |       | MGO +, enzyme - |       |      | MGO +, PAD4 +, DJ1 + |       |       | MGO +, mutant enzyme + |       |       |
|-----|-----------------|-------|-------|-----------------|-------|------|----------------------|-------|-------|------------------------|-------|-------|
| 0.0 | 100.0           | 100.0 | 100.0 | 100.0           | 100.0 | 100. | 100.0                | 100.0 | 100.0 | 100.0                  | 100.0 | 100.0 |
| 0.5 | 83.0            | 82.0  | 78.0  | 98.0            | 96.0  | 100. | 83.0                 | 87.0  | 90.0  | 99.0                   | 100.0 | 98.0  |
| 1.0 | 75.9            | 70.0  | 64.0  | 95.0            | 93.0  | 86.  | 78.0                 | 75.0  | 71.0  | 92.0                   | 93.0  | 89.0  |
| 1.5 | 62.0            | 50.0  | 64.0  | 89.5            | 82.0  | 90.  | 70.0                 | 65.0  | 63.0  | 82.0                   | 87.0  | 88.0  |
| 2.0 | 47.0            | 44.5  | 30.3  | 68.0            | 75.0  | 79.  | 46.0                 | 55.0  | 54.0  | 64.0                   | 70.0  | 82.0  |
| 2.5 | 10.1            | 14.0  | 5.6   | 58.0            | 40.0  | 53.  | 28.0                 | 20.0  | 22.0  | 55.0                   | 48.0  | 56.0  |

Fig. S8b

Supplementary Figure 10

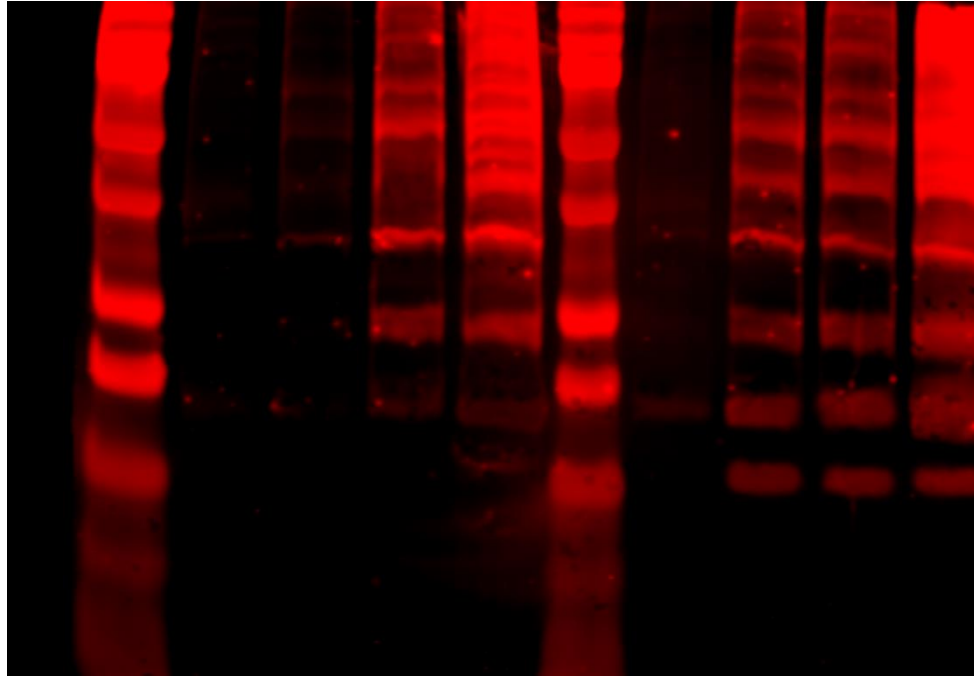

anti-MGO

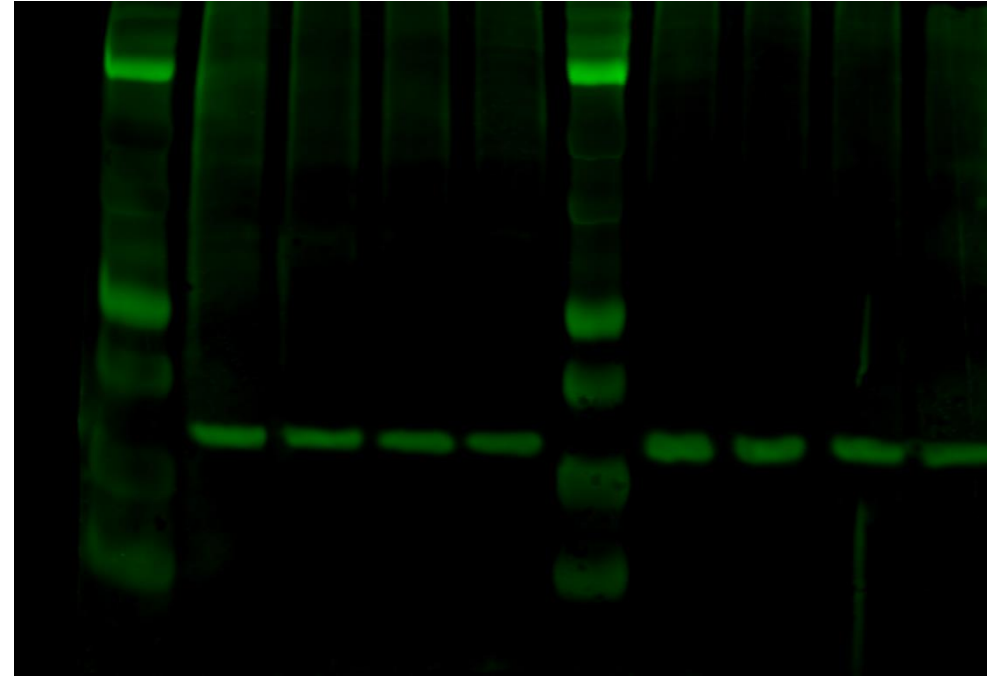

anti-H3

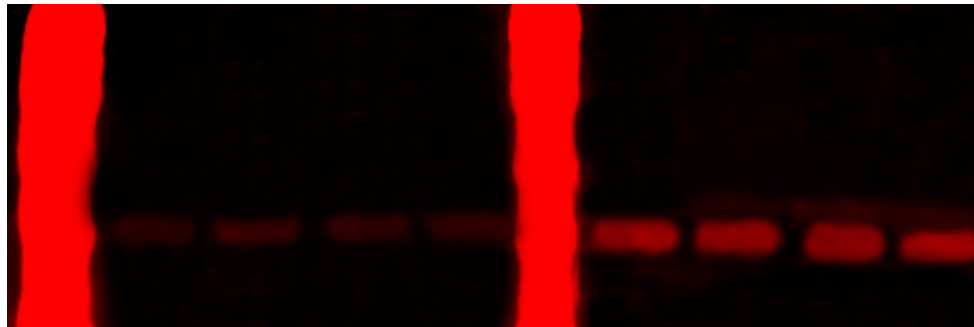

anti-H3Cit

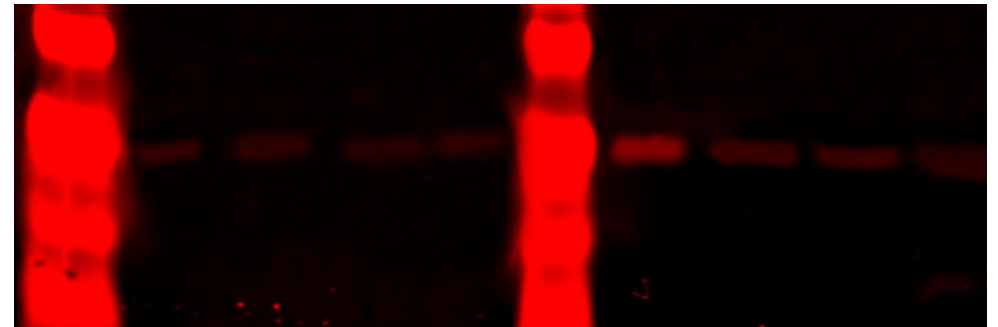

anti-H3R8me2

Supplementary Figure 12

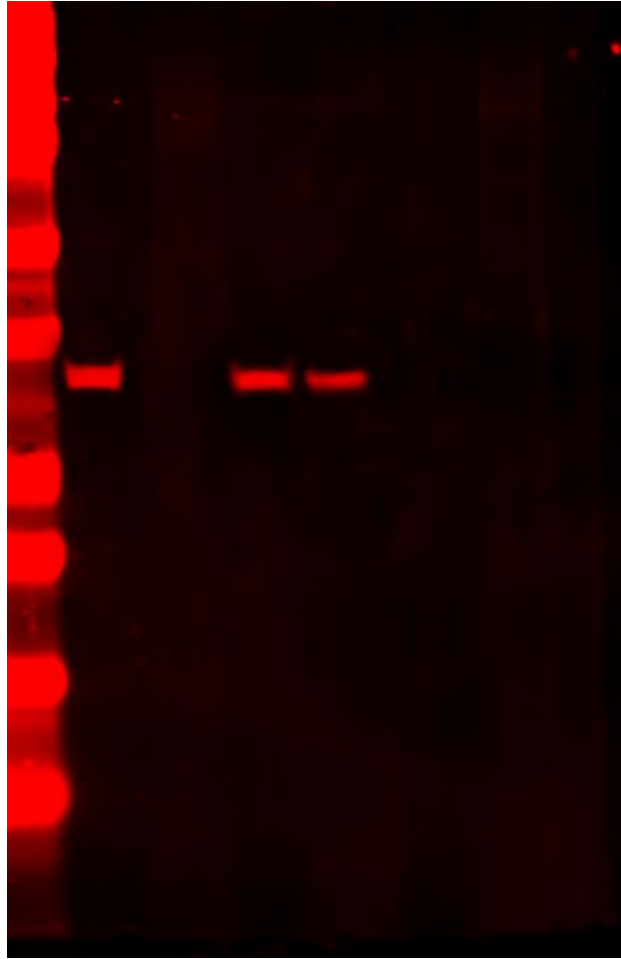

anti-PAD4

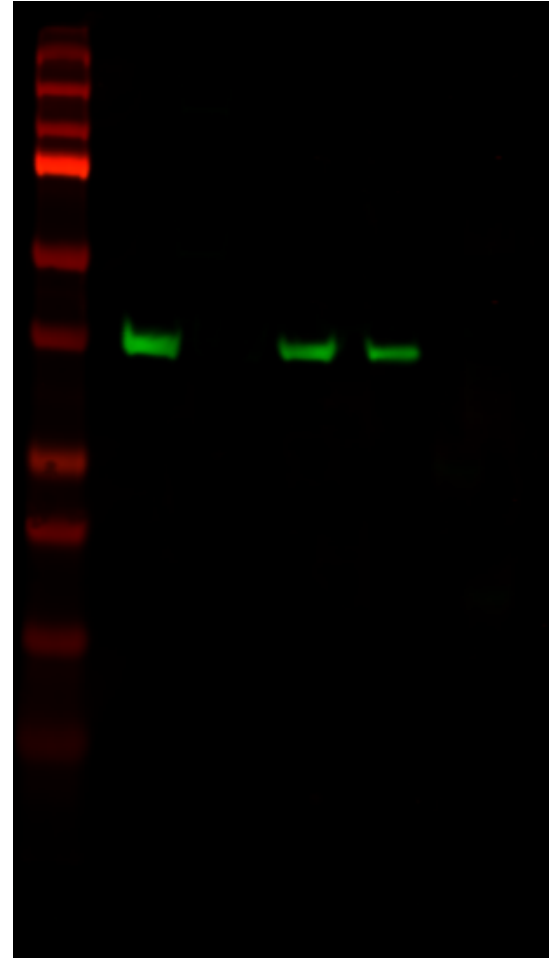

anti-HA

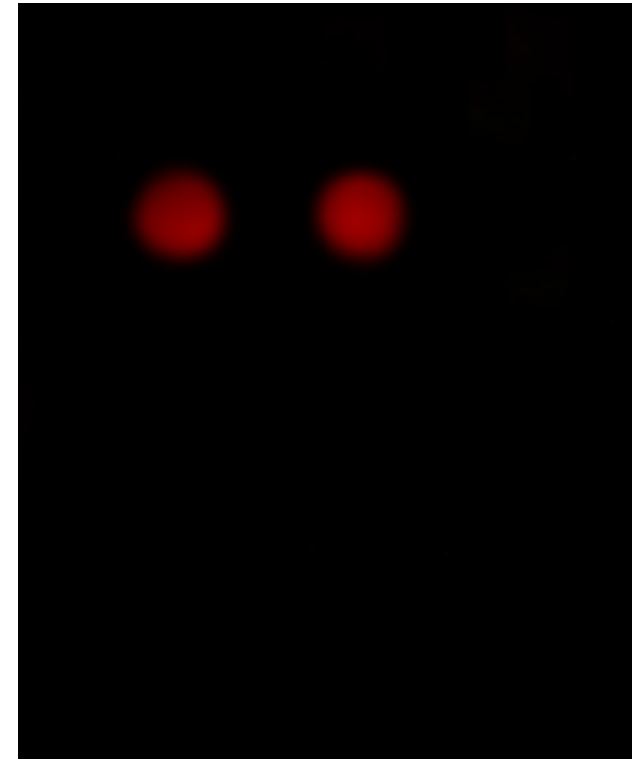

anti-MGO

# Supplementary Figure 13

| WT   | PAD4 (+) | PAD4-C645S (+) |
|------|----------|----------------|
| 100. | 160.     | 103.           |
| 100. | 180.     | 110.           |
| 100. | 148.     | 119.           |

|     | WT 293T Cells |      |      | PAD4 (+) |      |      | PAD4-C645S (+) |      |      |
|-----|---------------|------|------|----------|------|------|----------------|------|------|
| 0.0 | 100.          | 100. | 100. | 100.     | 100. | 100. | 100.           | 100. | 100. |
| 0.1 | 106.          | 104. | 110. | 111.     | 118. | 124. | 106.           | 107. | 109. |
| 0.2 | 94.           | 99.  | 90.  | 100.     | 110. | 101. | 98.            | 99.  | 96.  |
| 0.4 | 90.           | 80.  | 86.  | 102.     | 96.  | 99.  | 92.            | 86.  | 88.  |
| 0.8 | 82.           | 75.  | 86.  | 96.      | 88.  | 94.  | 87.            | 81.  | 86.  |
| 1.6 | 58.           | 60.  | 68.  | 82.      | 73.  | 80.  | 64.            | 65.  | 69.  |
| 3.2 | 25.           | 30.  | 35.  | 55.      | 65.  | 60.  | 24.            | 36.  | 45.  |

Supplementary Figure 14

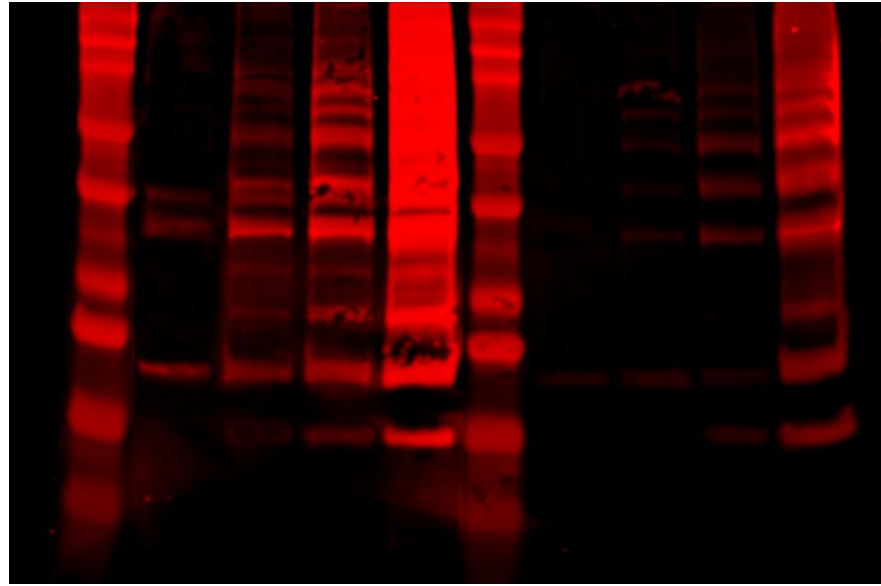

anti-MGO

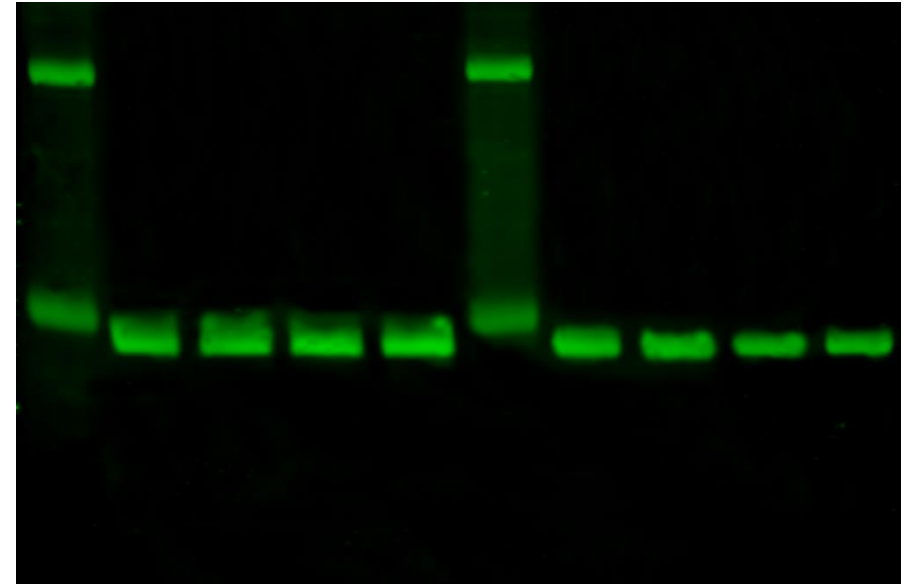

anti-H3

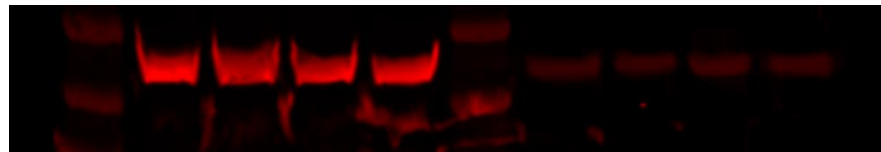

anti-H3Cit

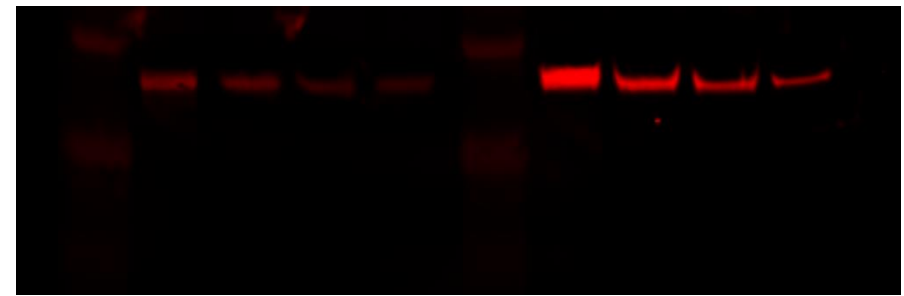

anti-H3R8me2

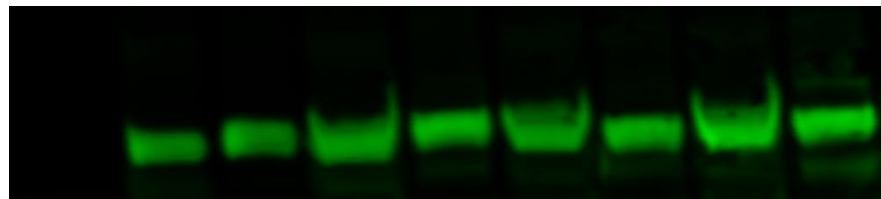

anti-PAD4

# Supplementary Figure 15

|             |             |             |             |             |              |             |           |             |             |             |
|-------------|-------------|-------------|-------------|-------------|--------------|-------------|-----------|-------------|-------------|-------------|
| <b>0.00</b> | <b>0.10</b> | <b>0.30</b> | <b>0.11</b> | <b>0.15</b> | <b>0.180</b> | <b>0.80</b> | <b>1.</b> | <b>0.00</b> | <b>0.08</b> | <b>0.09</b> |
| <b>0.02</b> | <b>0.12</b> | <b>0.56</b> | <b>0.14</b> | <b>0.17</b> | <b>0.170</b> | <b>0.65</b> | <b>1.</b> | <b>0.01</b> | <b>0.10</b> | <b>0.11</b> |
| <b>0.01</b> | <b>0.14</b> | <b>0.40</b> | <b>0.15</b> | <b>0.16</b> | <b>0.190</b> | <b>0.70</b> | <b>1.</b> | <b>0.02</b> | <b>0.12</b> | <b>0.14</b> |

Fig. S15a

|           |             |             |            |            |             |            |             |             |            |            |            |
|-----------|-------------|-------------|------------|------------|-------------|------------|-------------|-------------|------------|------------|------------|
| <b>0.</b> | <b>0.10</b> | <b>0.20</b> | <b>1.0</b> | <b>1.0</b> | <b>1.00</b> | <b>10.</b> | <b>15.0</b> | <b>17.0</b> | <b>38.</b> | <b>40.</b> | <b>50.</b> |
| <b>0.</b> | <b>0.01</b> | <b>0.05</b> | <b>0.2</b> | <b>0.3</b> | <b>0.12</b> | <b>3.</b>  | <b>4.0</b>  | <b>4.8</b>  | <b>19.</b> | <b>21.</b> | <b>26.</b> |

Fig. S15b

|            |             |              |            |            |             |            |            |            |            |            |            |
|------------|-------------|--------------|------------|------------|-------------|------------|------------|------------|------------|------------|------------|
| <b>0.3</b> | <b>0.50</b> | <b>0.250</b> | <b>1.0</b> | <b>1.0</b> | <b>1.00</b> | <b>1.6</b> | <b>2.5</b> | <b>2.9</b> | <b>5.0</b> | <b>6.0</b> | <b>8.0</b> |
| <b>0.0</b> | <b>0.20</b> | <b>0.125</b> | <b>0.3</b> | <b>0.5</b> | <b>0.48</b> | <b>0.5</b> | <b>0.8</b> | <b>1.0</b> | <b>1.8</b> | <b>2.0</b> | <b>3.0</b> |

Fig. S15c
